# Supplementary material for: Metal dimer nanojunction-magnetic material composites for magnetic field sensing
Source: Royal Society of Chemistry journal article supplement (doi:10.1039/d3mh01694c), 2023-11-13
Supplement: d3mh01694c1.pdf [file d3mh01694c1.pdf]

# **Metal Dimer Nanojunctions Composites with Magnetic Materials for Magnetic Field Sensing**

Gang-Yi Chen and Su-Wen Hsu\*

Department of Chemical Engineering, National Cheng Kung University, Taiwan

No. 1 University Road, East Dist., Tainan City 70101, Taiwan (R.O.C)

\*E-mail: [swhsu@gs.ncku.edu.tw](mailto:swhsu@gs.ncku.edu.tw)
